# Supplementary material
Source: PubMed Central journal article supplement (PMC2576382)
Supplement: 108.131318_1.pdf [file 108.131318_1.pdf]

**Supplemental Online Data**

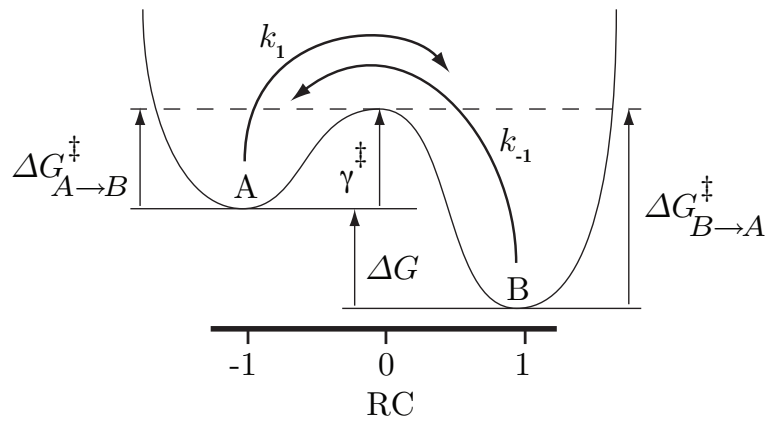

Figure 1: Energy surface of a reversible noise-induced transition in a bi-metastable potential.

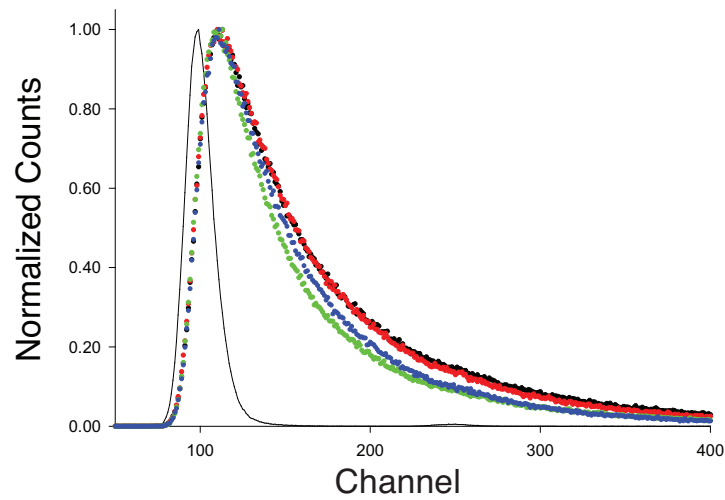

Figure 2: Time resolved decays of Trp12 in TnC(12W/C51±AEDANS) showing the effect of TnI addition (48.8 ps/channel). TnC in 160  $\mu\text{M}$   $\text{Ca}^{2+}$ : donor-only (black), donor-acceptor (green). TnC in 160  $\mu\text{M}$   $\text{Ca}^{2+}$  + 2-fold excess of TnI: donor-only (red). Donor-acceptor (blue). Impulse response (black line).
